# Supplementary material for: Temporal and Spatial Patterns of Plant Consumption by the World’s Southernmost Parrot in Natural and Urban Environments
Source: Research Square preprint supplement (doi:10.21203/rs.3.rs-6136068/v1), 2025-03-14

# SUPPLEMENTARY MATERIAL

FIGURE 1**.** Set of bipartite networks representing the interactions between the pair of months and the plants preyed on by the Austral parakeet in natural environments (Bariloche, Argentina). Nd: *Nothofagus dombeyi*; Spa: *Schinus patagonicus*; Ach: *Aristotelia chilensis*; Mb: *Maytenus boaria*; Lh: *Lomatia hirsuta*; Sa: *Sorbus aucuparia*; Pi: *Pinus spp.*; Md: *Malus domestica*; Np: *Nothofagus pumilio;* Ec: *Embothrium coccineum*; Na: *Nothofagus antarctica.*


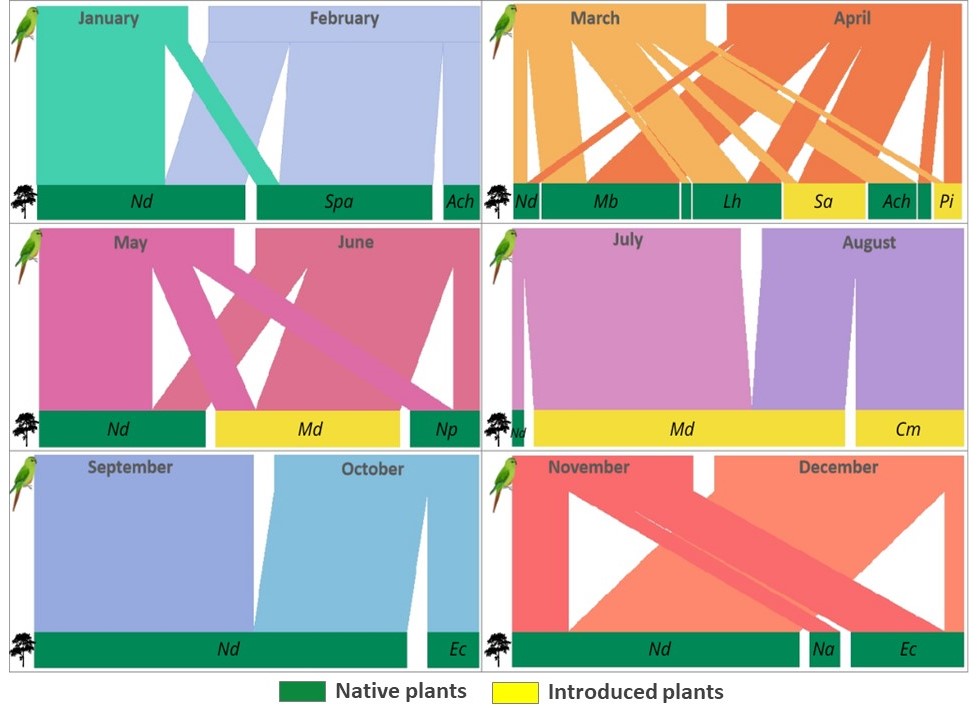


FIGURE 2**.** Set of bipartite networks representing the interactions between the pair of months and the plants preyed on by the Austral parakeet in urban environments (Bariloche, Argentina). Aa: *Araucaria araucana*; Ac: *Acer sp.*; Ach: *Aristotelia chilensis*; Asp: *Acacia sp.*; Bp: *Betula pendula*; Cf: *Cotoneaster franchetii*; Cm: *Crataegus monogyna*; Ec: *Embothrium coccineum*; Jr: *Juglans regia*; Na: *Nothofagus antarctica*; Nd: *Nothofagus dombeyi*; No: *Nothofagus oblicua*; Mb: *Maytenus boaria*; Md: *Malus domestica*; Spa: *Schinus patagonicus*; Ul: *Ulmus sp.*; Pc: *Prunus cerazus*; Pi: *Pinus spp.*; Po: *Populus sp.*; Ps: *Prunus serrulata*; Sa: *Sorbus aucuparia*.


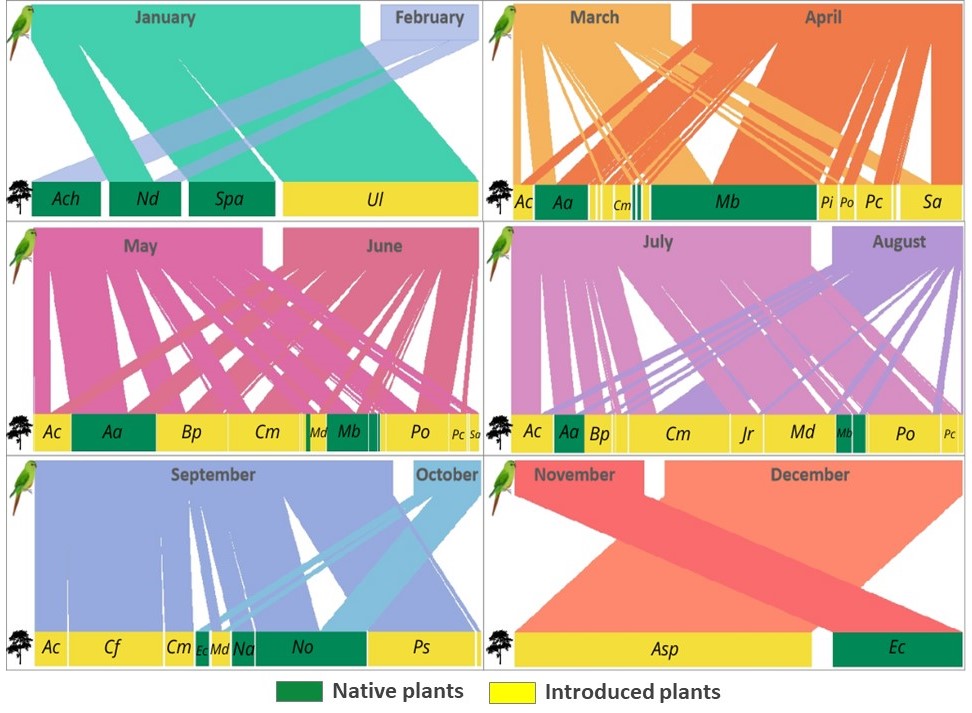

Supplement: Supplementary file 1 [file bd6230ae2bac75ae2c8567dc.docx]
